# Supplementary material for: [{VOCl2(CH2(COOEt)2)}4] as a molecular precursor for thermochromic monoclinic VO2 thin films and nanoparticles
Source: Royal Society of Chemistry journal article supplement (doi:10.1039/c6tc03482a), 2016-01-01
Supplement: c6tc03482a1.pdf [file c6tc03482a1.pdf]

**[{VOCl<sub>2</sub>(CH<sub>2</sub>(COOEt)<sub>2</sub>)}<sub>4</sub>] as a molecular precursor for thermochromic monoclinic VO<sub>2</sub> thin films and nanoparticles- ESI**

**Ben Blackburn,<sup>a</sup> Joseph C. Bear,<sup>\*a</sup> Michael J. Powell,<sup>a</sup> Claire J. Carmalt<sup>a</sup> and Ivan P. Parkin<sup>a</sup>**

**[a] Department of Chemistry, University College London, 20 Gordon Street, London. WC1H 0AJ, UK.**

## **Table of Contents**

|                                                 |    |
|-------------------------------------------------|----|
| AACVD Schematic .....                           | 2  |
| Additional TEM characterisation .....           | 3  |
| Additional thermochromic UV/Vis/ XRD data ..... | 6  |
| Additional SEM characterisation .....           | 9  |
| EDS spectral data .....                         | 10 |

## AACVD Schematic

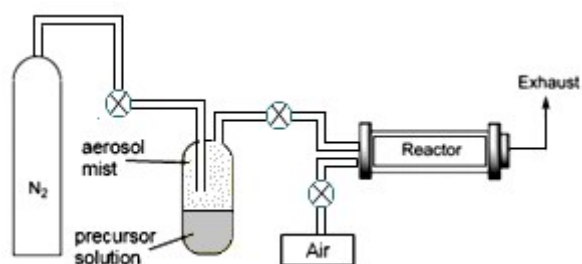

**Scheme S1:** Schematic diagram of the aerosol assisted chemical vapour deposition (AACVD) apparatus.

## Additional TEM characterisation

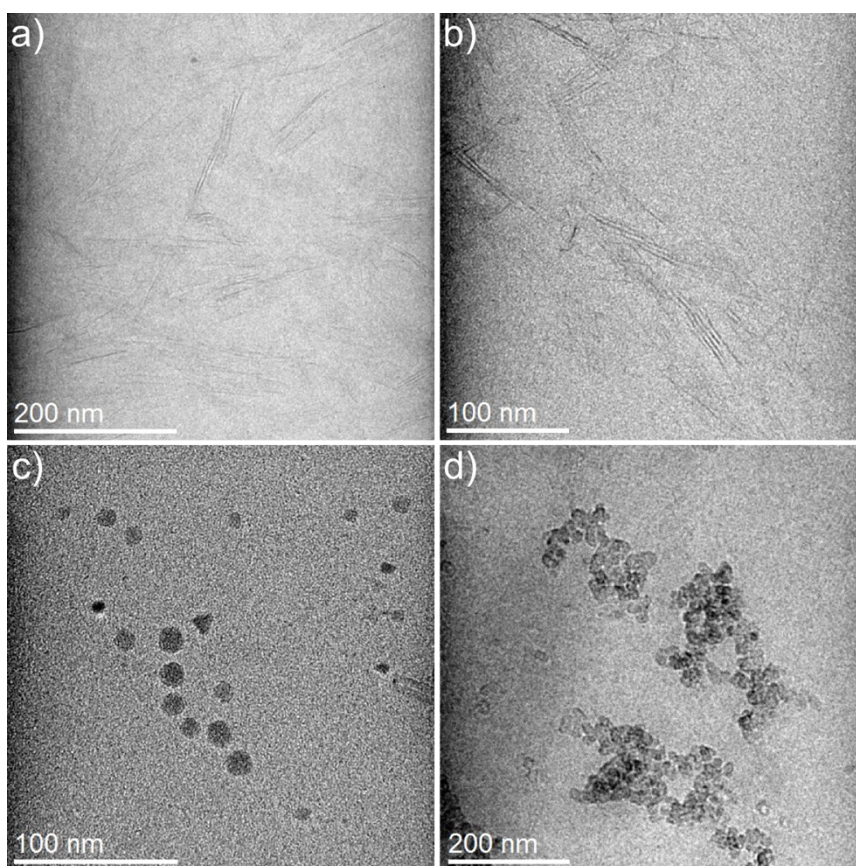

**Figure S1:** TEM images of nanoparticle samples: a) and b) Sample 2 showed evidence of vanadium oxide “spines” in hollow tube-like configurations. Sample 3 (c) showed that in a greater oleic acid:oleylamine ratio, particle formation was seen. In an oleic acid environment, anisotropic particles were observed, as in image d).

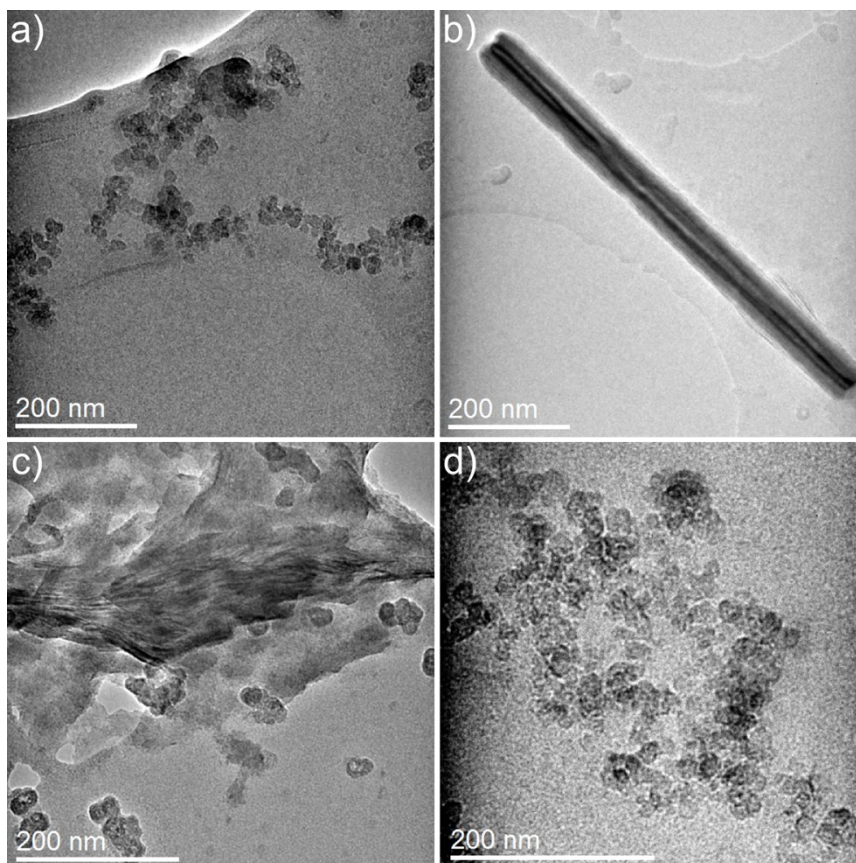

**Figure S2:** TEM images of nanoparticle samples: a) Sample 4, b) and c) show the effect of oleyamine, which favoured rod and spine growth. The addition of 1,4-tetradecanediol with the “6,6” blend of oleic acid and oleyamine promoted particle growth analogous to sample 3 (figure ES1xx, d)).

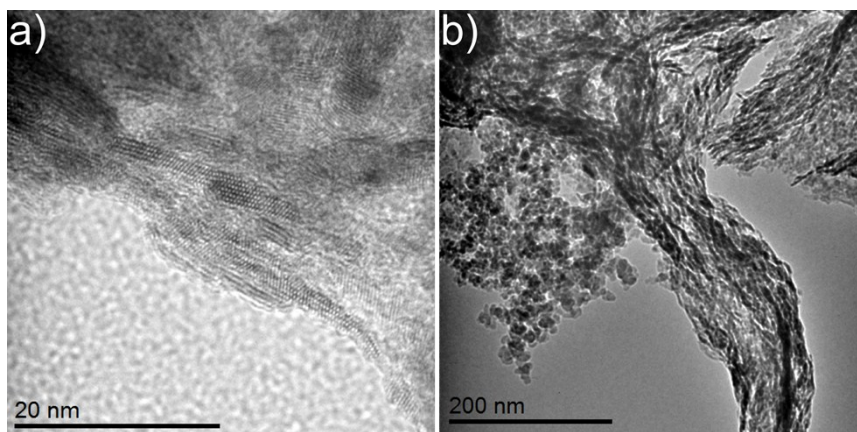

**Figure S3:** TEM images of sample 6 post anneal. a) shows a  $d$ -spacing of 0.327 nm, corresponding to the  $\langle 111 \rangle$  plane of vanadium oxide ( $V_4O_9$ , ICSD 15041).

Additional thermochromic UV/Vis/ XRD data

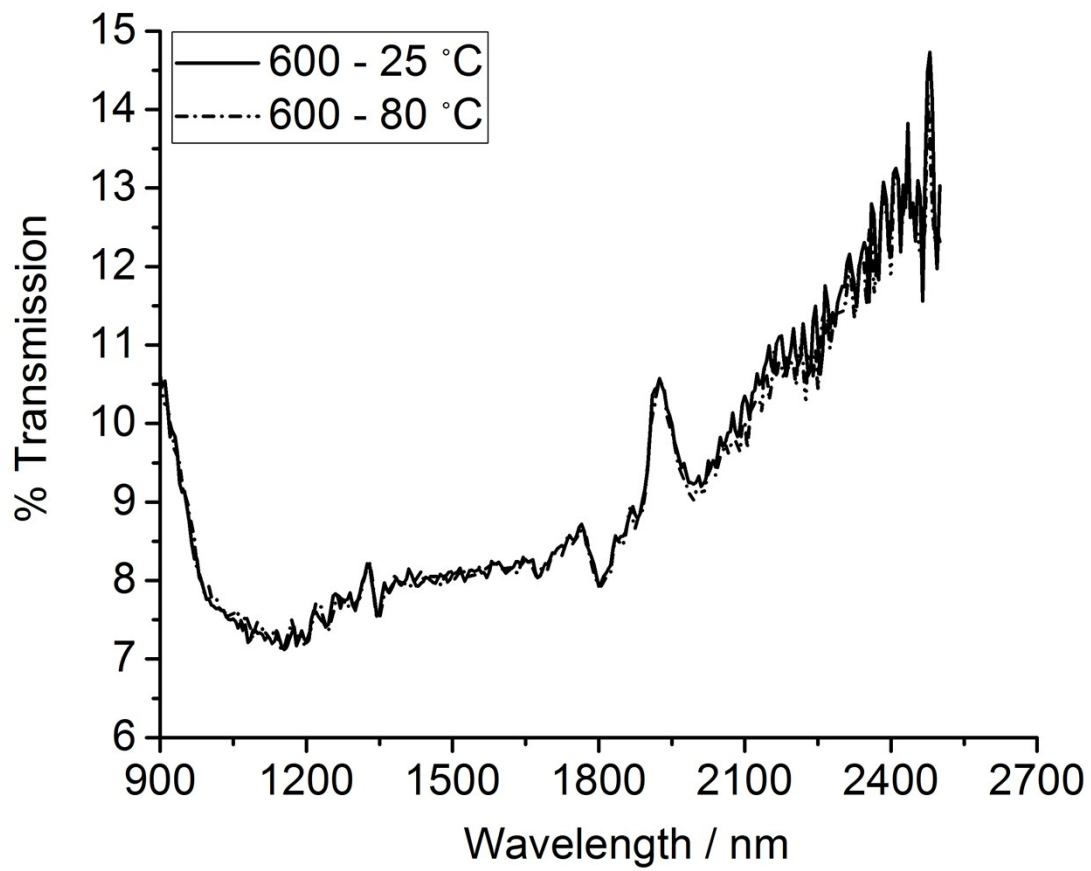

Figure S4: Variable temperature UV/Vis/NIR spectrum of the vanadium oxide thin film deposited at 600 °C, showing the absence of a thermochromic switch.

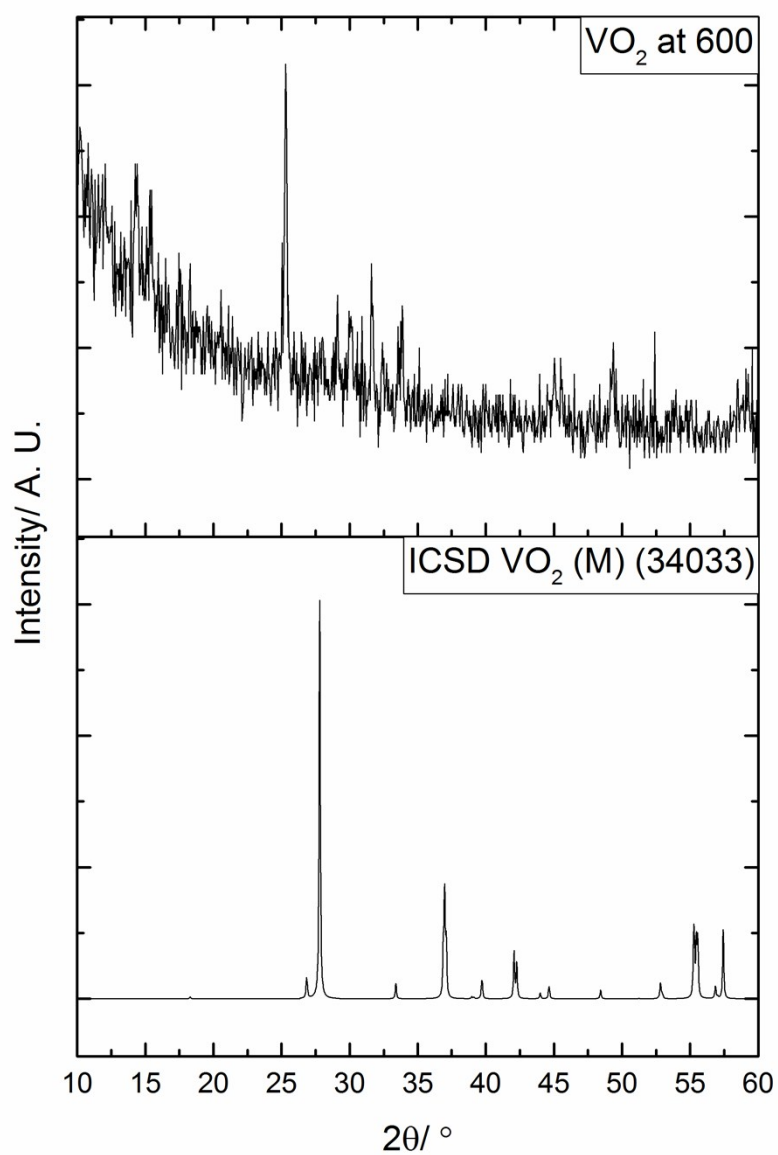

**Figure S5:** (Top): XRD pattern of vanadium oxide thin film deposited at 600 °C, showing poor crystallinity and phase purity. (Bottom): VO<sub>2</sub> (M) ICSD standard pattern number 34033.

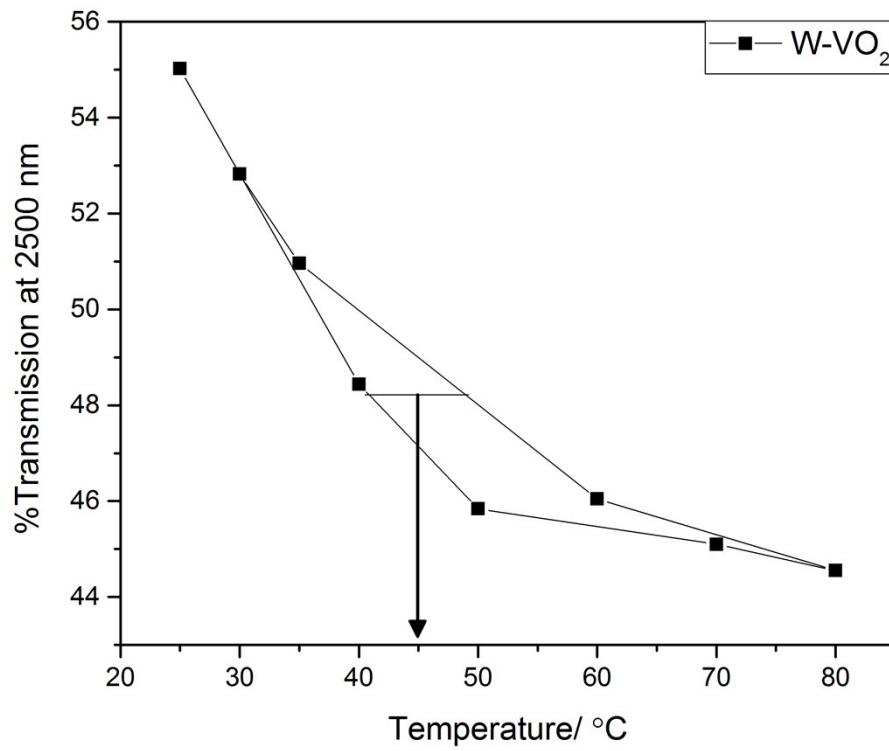

**Figure S6:** Hysteresis loop data for sample W-VO<sub>2</sub> deposited at 550 °C by AACVD. The incorporation of tungsten into the VO<sub>2</sub> lattice led to a reduction of the MST phase transition temperature to *ca.* 45 °C.



## Additional SEM characterisation

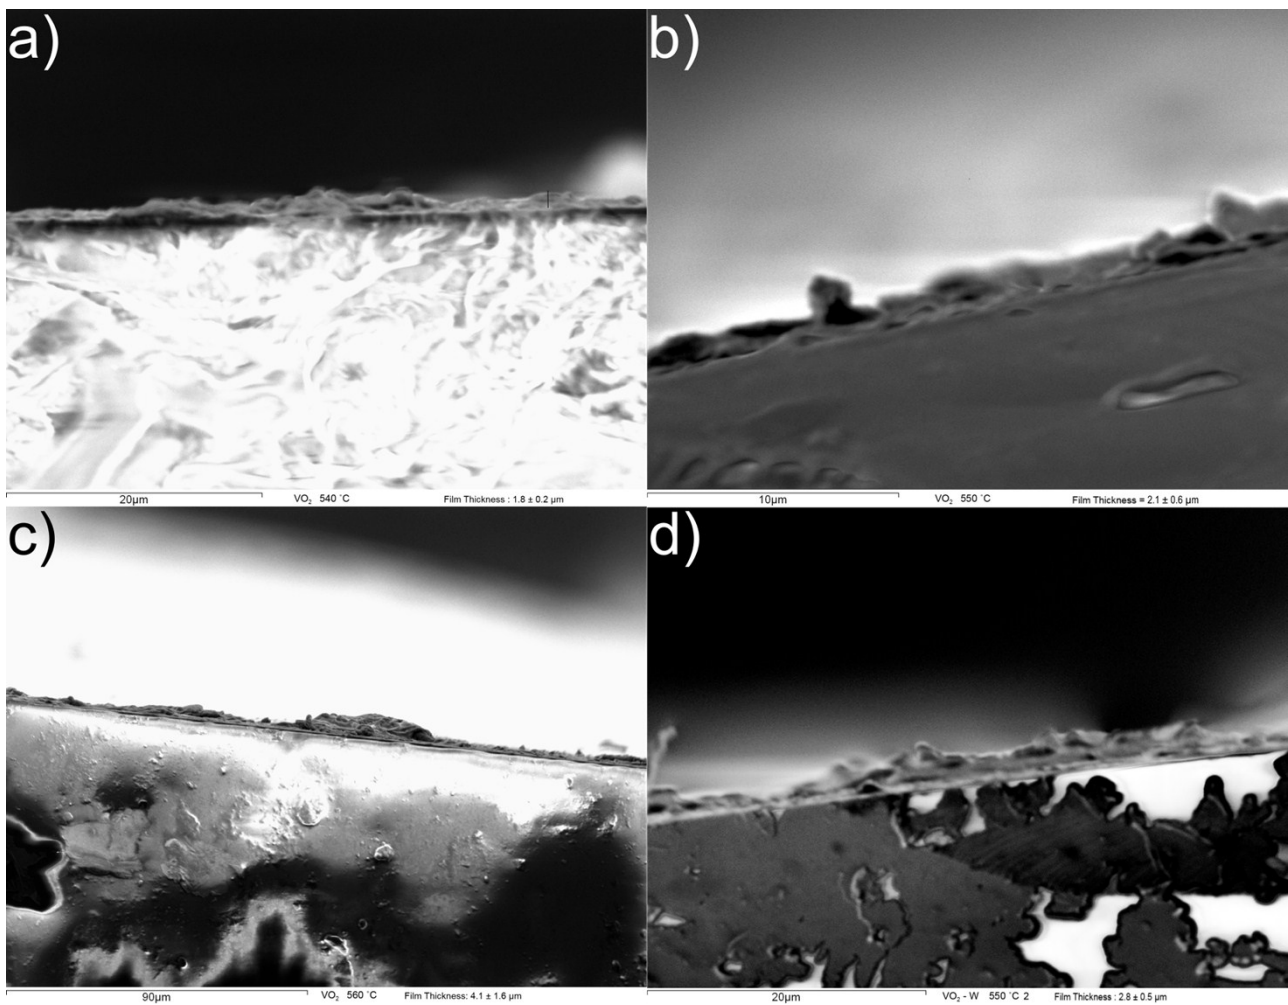

**Figure S7:** Side-on SEM images of thermochromic  $\text{VO}_2$  (M) thin films deposited onto glass substrates by AACVD at: a)  $540^\circ\text{C}$ , b)  $550^\circ\text{C}$  and c)  $560^\circ\text{C}$ . d) is the W-doped  $\text{VO}_2$  thin film deposited at  $550^\circ\text{C}$ . Film thicknesses are as follows: a)  $1.8 \pm 0.2 \mu\text{m}$ , b)  $2.1 \pm 0.6 \mu\text{m}$ , c)  $4.1 \pm 1.6 \mu\text{m}$  and d)  $2.8 \pm 0.5 \mu\text{m}$ .

## EDS spectral data

| Sample number | V / at.%       | O / at.%       |
|---------------|----------------|----------------|
| 1             | 26.2<br>(26.4) | 73.8<br>(73.6) |
| 2             | 9.66           | 90.3           |
| 3             | 1.82           | 98.2           |
| 4             | 0.180          | 99.8           |
| 5             | 29.0           | 71.1           |
| 6             | 1.91<br>(26.2) | 98.1<br>(73.8) |
| 8             | 10.2           | 89.8           |

**Table S1:** EDS at. % ratios of vanadium to oxygen in nanomaterial samples. Bracketed quantities are those in the annealed spectra.
